# Supplementary material for: Facile synthesis of TiO2/Mn3O4hierarchical structures for fiber-shaped flexible asymmetric supercapacitors with ultrahigh stability and tailorable performance
Source: Royal Society of Chemistry journal article supplement (doi:10.1039/c6ta08132k), 2016-11-18
Supplement: c6ta08132k1.pdf [file c6ta08132k1.pdf]

## Supporting information for

### **Facile synthesis of TiO<sub>2</sub>/Mn<sub>3</sub>O<sub>4</sub> hierarchical structures for fiber-shaped flexible asymmetric supercapacitor with ultrahigh stable and tailorable performance**

Rui Lin<sup>a,b</sup>, Zihan Zhu<sup>a,c</sup>, Xiang Yu<sup>d</sup>, Ying Zhong<sup>a</sup>, Zilong Wang<sup>a</sup>, Shaozao Tan<sup>b</sup>, Chuanxi Zhao<sup>\*a</sup>, Wenjie Mai<sup>\*a</sup>

<sup>a</sup>Siyuan laboratory, Guangzhou Key Laboratory of Vacuum Coating Technologies and New Energy Materials, Department of Physics, Jinan University, Guangzhou, Guangdong 510632, P.R.China.

<sup>b</sup>Department of Chemistry, Jinan University, Guangzhou, Guangdong 510632, China

<sup>c</sup>Department of Materials Science and Engineering, Jinan University, Guangzhou, Guangdong 510632, China

E-mail: [tcxzhao@email.jnu.edu.cn](mailto:tcxzhao@email.jnu.edu.cn), [wenjjiemai@email.jnu.edu.cn](mailto:wenjjiemai@email.jnu.edu.cn)

#### **Contents:**

Calculation methods

1. **Electrode**
2. **Device**

**Calculation methods**

## 1. Electrode

Moreover, the linear capacitance ( $C_l$ ) and volume capacitance ( $C_v$ ) of the electrode were given and the formula (1, 2) of the CV curve is put as follows:

$$C_l = \frac{\int IdU}{L\Delta U} = \frac{S}{2Lv\Delta U_p} \quad (1)$$

$$C_v = \frac{\int IdU}{V\Delta U} = \frac{S}{2Vv\Delta U_p} \quad (2)$$

Where  $\Delta U_p$  is potential window,  $S$  is the area of the closed CV curve,  $v$  is scan rate and  $L/V$  is effective linear/volume of the working electrode.

## 2. Device

The linear capacitance ( $C_{cell-L}$ ) and volume capacitance ( $C_{cell-V}$ ) of the device were calculated from the CV curves by the following formulas (3, 4):

$$C_{cell-L} = \frac{\int IdU}{L\Delta U} = \frac{S}{2Lv\Delta U_v} \quad (3)$$

$$C_{cell-V} = \frac{\int IdU}{V\Delta U} = \frac{S}{2Vv\Delta U_v} \quad (4)$$

Where  $\Delta U_v$  is voltage window,  $S$  is the area of the closed CV curve,  $v$  is scan rate and  $L/V$  is effective length/volume of the device.

Additionally, the volume capacitance ( $C_{cell-V}$ ) of the device based GCD curves can be calculated from the following equation:

$$C_{cell-V} = \frac{I\Delta t}{\Delta U_v} \quad (5)$$

Where  $I$  is the discharge current,  $\Delta t$  is the discharge time,  $\Delta U_v$  is the voltage window. And the energy and power density could be estimated by the following formulas (6, 7):

$$E = \frac{C_{cell-V}\Delta U_v^2}{2V} \quad (6)$$

$$P = \frac{E}{\Delta t} \quad (7)$$

Where the  $C_{cell-V}$  is the volume capacitance of the working device from formulas (5),  $\Delta U_v$  is the voltage window.  $V$  is the effective volume and  $\Delta t$  is the discharge time of GCD curves.

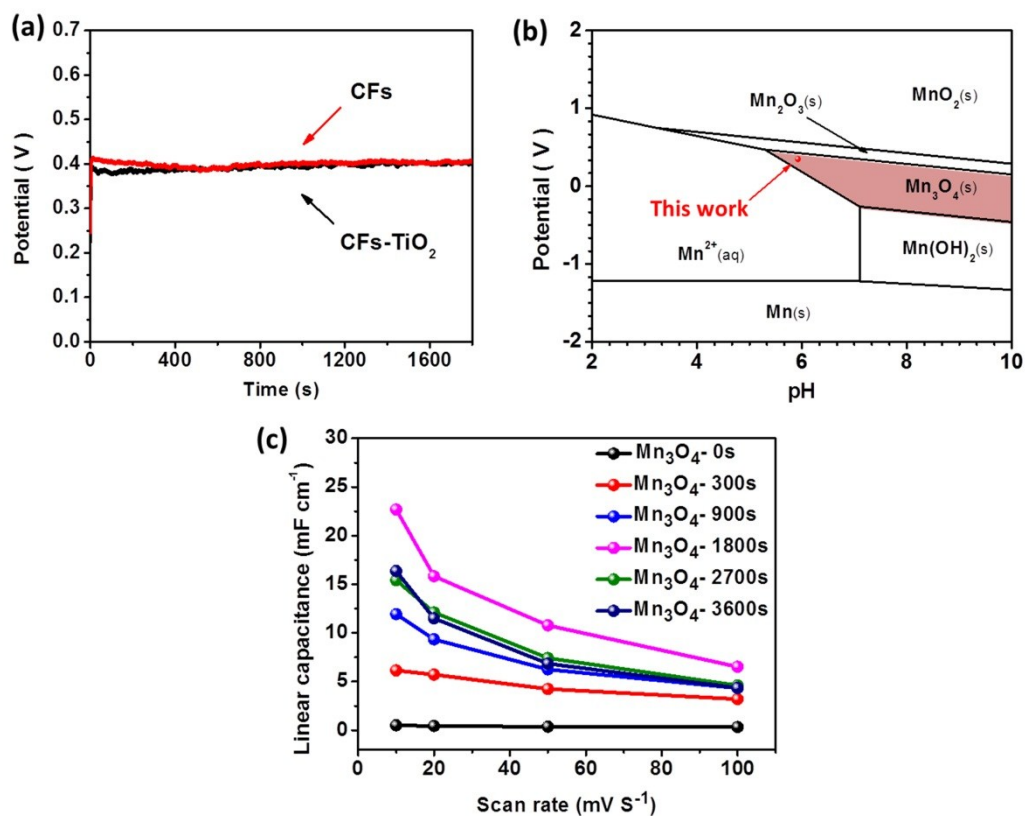

**Fig. S1** (a) Voltage-time variation in electrodeposition process, which could reveal the stable voltage when applying slight current at 0.5 mA to the working electrode. (b) Pourbaix (E-pH) diagram of 0.1 M Mn-H<sub>2</sub>O system, which shows the thermodynamic stability of possible phases and ionic species in the deposition solution at different pH values and potentials in 70 °C. (c) Various electrodeposition time and corresponding electrochemical performance of the electrodes.

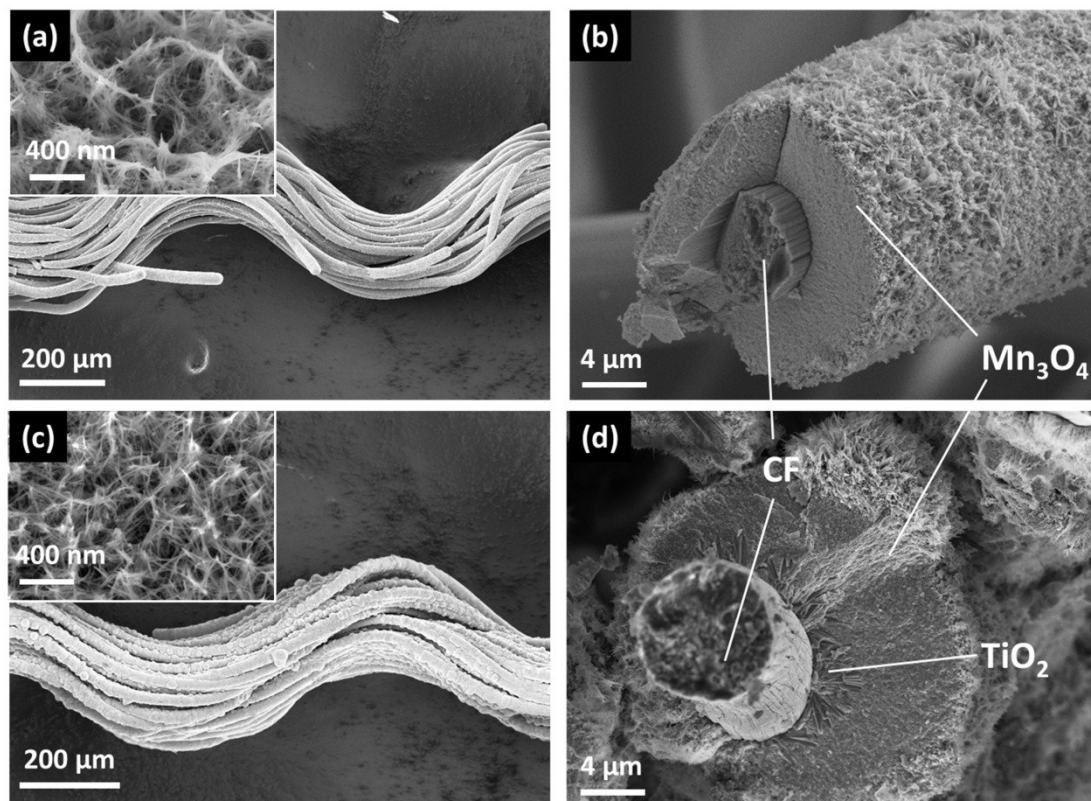

**Fig. S2** SEM images of the  $\text{Mn}_3\text{O}_4$  electrode and  $\text{TiO}_2/\text{Mn}_3\text{O}_4$  electrode. (a) Typical image of the fiber-shaped  $\text{Mn}_3\text{O}_4$  electrode. (b) Cross-sectional image of the  $\text{Mn}_3\text{O}_4$  nanostructure covering on single carbon fiber. (c) SEM image of the fiber-shaped  $\text{TiO}_2/\text{Mn}_3\text{O}_4$  electrode with many typical urchin-like  $\text{Mn}_3\text{O}_4$  nanospines. (d) Cross-sectional image of the  $\text{TiO}_2/\text{Mn}_3\text{O}_4$  nanostructure covering on single carbon fiber.

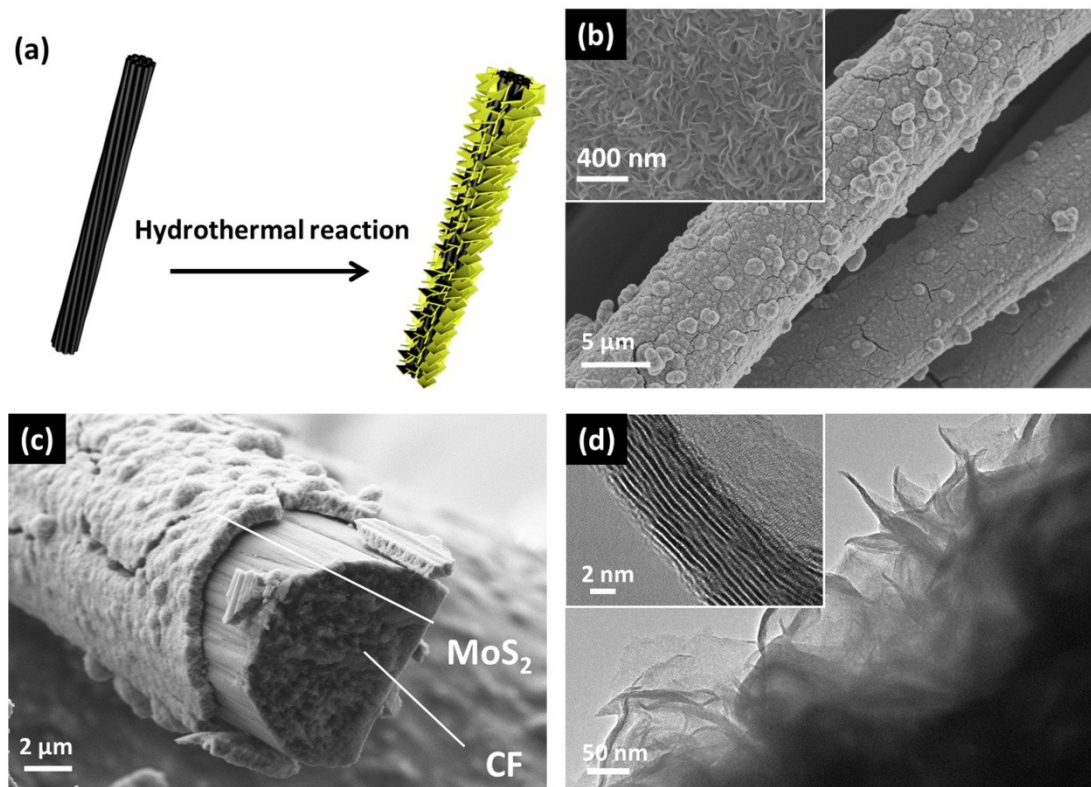

**Fig. S3** (a) Schematic illustrating the synthesis procedure of MoS<sub>2</sub> electrode. (b) Typical image of the fiber-shaped MoS<sub>2</sub>-coated electrode. (c) Cross-sectional image of the CF. (d) TEM image of the MoS<sub>2</sub> structure, insets show the typical lamellar structure of MoS<sub>2</sub>.

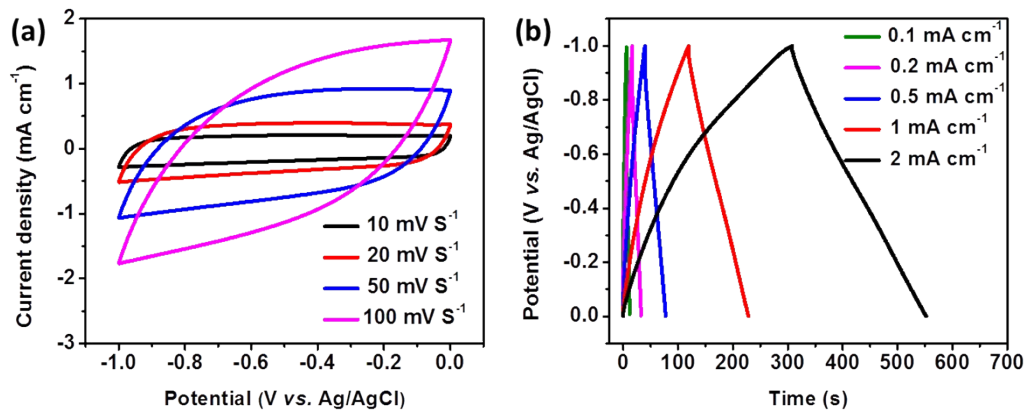

**Fig. S4** (a) Different scan rates of CV curves for fiber-shaped MoS<sub>2</sub> electrode. (b) Galvanostatic charge/discharge curves at different current for fiber-shaped MoS<sub>2</sub> electrode. .

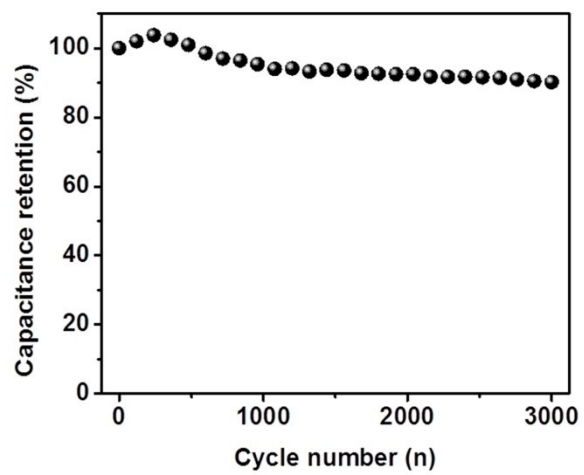

**Fig. S5** Cycle stability for fiber-shaped MoS<sub>2</sub>//TiO<sub>2</sub>/Mn<sub>3</sub>O<sub>4</sub> ASC device measured at 100 mV s<sup>-1</sup>.

**Table S1** Electrochemical performances of some previous fiber-shaped supercapacitors

| Device configuration | Electrode material                                                  | Capacitance                                               | Energy density            | Power density           | Cycle test            | Time      |
|----------------------|---------------------------------------------------------------------|-----------------------------------------------------------|---------------------------|-------------------------|-----------------------|-----------|
| Parallel             | MnO <sub>2</sub>                                                    | 2.5 F cm <sup>-3</sup>                                    | 0.22 mWh cm <sup>-3</sup> | 0.4 W cm <sup>-3</sup>  | 84 % at 10000 cycles  | 2012 [29] |
| Parallel             | CNT/MnO <sub>2</sub>                                                | 25.4 F cm <sup>-3</sup>                                   | 3.52 mWh cm <sup>-3</sup> | 127 mW cm <sup>-3</sup> | n.a.                  | 2014 [10] |
| Parallel             | MnO <sub>2</sub> @CNT                                               | 9.1 mF cm <sup>-1</sup>                                   | 0.78 mWh cm <sup>-3</sup> | 20 mW cm <sup>-3</sup>  | 84.8 % at 1000 cycles | 2015 [9]  |
| Parallel             | rGO@MnO <sub>2</sub> @PPy                                           | 12.4 F cm <sup>-3</sup>                                   | 0.20 mWh cm <sup>-3</sup> | 150 mW cm <sup>-3</sup> | 92 % at 4950 cycles   | 2015 [13] |
| Parallel             | MnO <sub>2</sub> /rGO/CF//GH/CW                                     | 2.54 F cm <sup>-3</sup>                                   | 0.9 mWh cm <sup>-3</sup>  | 0.2 W cm <sup>-3</sup>  | 90 % at 10000 cycles  | 2015 [28] |
| Parallel             | N-MoO <sub>3-x</sub> //MnO <sub>2</sub> @TiN                        | 10.3 mF cm <sup>-1</sup> /<br>4.1 F cm <sup>-3</sup>      | 2.29 mWh cm <sup>-3</sup> | 1.64 W cm <sup>-3</sup> | 80.3 % at 5000 cycles | 2016 [30] |
| Parallel             | MoS <sub>2</sub> //TiO <sub>2</sub> /Mn <sub>3</sub> O <sub>4</sub> | 15.28 mF cm <sup>-1</sup> /<br>1/19.84 F cm <sup>-3</sup> | 11.4 mWh cm <sup>-3</sup> | 2.34 W cm <sup>-3</sup> | 90.2 % at 3000 cycles | This work |

**References:**

- Pu, X., Li, L., Liu, M., Jiang, C., Du, C., Zhao, Z., Hu, W.; Wang, Z. L., *Adv. Mater.* 28 (2016) 98-105.
- Wang, B., Fang, X., Sun, H., He, S., Ren, J., Zhang, Y.; Peng, H., *Adv Mater* 27 (2015) 7854-60.
- Huang, Y., Hu, H., Huang, Y., Zhu, M., Meng, W., Liu, C., Pei, Z., Hao, C., Wang, Z.; Zhi, C., *ACS nano* 9 (2015) 4766-75.
- Zhang, Z., Xiao, F.; Wang, S., *J. Mater. Chem. A* 3 (2015) 11215-11223.
- Xiao, X., Li, T., Yang, P., Gao, Y., Jin, H., Ni, W., Zhan, W., Zhang, X., Cao, Y., Zhong, J., Gong, L., Yen, W. C., Mai, W., Chen, J., Huo, K., Chueh, Y. L., Wang, Z. L.; Zhou, J., *ACS nano* 6 (2012) 9200-6.
- Yu, M., Cheng, X., Zeng, Y., Wang, Z., Tong, Y., Lu, X.; Yang, S., *Angew. Chem.* 55 (2016) 6762-6.
